# Supplementary material
Source: ML conference proceedings conference paper supplement (https://proceedings.mlr.press/v139/wang21h.html)
Supplement: Supplementary file 1 [file wang21h-supp.pdf]

---

## Label Distribution Learning Machine – Supplementary Material

---

Before proving Theorems 1 and 2, we first introduce the following lemma proved in (Wang & Geng, 2019).

**Lemma 1.** *Let  $c_1, c_2, c_3$  and  $c_4$  be real values satisfying  $c_1 > c_2$  and  $c_3 > c_4$ . Then,  $c_1 - c_2 < |c_1 - c_4| + |c_2 - c_3|$ .*

### A. Proof of Theorem 1

**Theorem 1.** *For each  $\mathbf{x} \in \mathcal{X}$ , if the predicted label distribution satisfies the following inequality*

$$\sum_j |d_{\mathbf{x}}^{y_j} - \hat{d}_{\mathbf{x}}^{y_j}| \leq \alpha_{\mathbf{x}},$$

*the predicted label satisfies  $\hat{y}_{\mathbf{x}} = y_{\mathbf{x}}$ .*

*Proof.* We prove by contradiction. Suppose for the sake of contradiction that  $\hat{y}_{\mathbf{x}} \neq y_{\mathbf{x}}$ . Without loss of generality, let  $y_{\mathbf{x}} = y_j$  and  $\hat{y}_{\mathbf{x}} = y_i$  for  $i \neq j$ . Recall the definition of  $y_{\mathbf{x}} = \arg \max_{\bar{y}} d_{\mathbf{x}}^{\bar{y}}$  and  $\hat{y}_{\mathbf{x}} = \arg \max_{\bar{y}} \hat{d}_{\mathbf{x}}^{\bar{y}}$ . Then, we have  $d_{\mathbf{x}}^{y_j} > d_{\mathbf{x}}^{y_i}$  and  $\hat{d}_{\mathbf{x}}^{y_i} > \hat{d}_{\mathbf{x}}^{y_j}$ . By Lemma 1,

$$d_{\mathbf{x}}^{y_j} - d_{\mathbf{x}}^{y_i} < |d_{\mathbf{x}}^{y_j} - \hat{d}_{\mathbf{x}}^{y_j}| + |d_{\mathbf{x}}^{y_i} - \hat{d}_{\mathbf{x}}^{y_i}|. \quad (1)$$

Further, observe that  $\alpha_{\mathbf{x}} \leq d_{\mathbf{x}}^{y_j} - d_{\mathbf{x}}^{y_i}$  and  $|d_{\mathbf{x}}^{y_j} - \hat{d}_{\mathbf{x}}^{y_j}| + |d_{\mathbf{x}}^{y_i} - \hat{d}_{\mathbf{x}}^{y_i}| \leq \sum_l |d_{\mathbf{x}}^{y_l} - \hat{d}_{\mathbf{x}}^{y_l}|$ , which yields

$$\alpha_{\mathbf{x}} < \sum_l |d_{\mathbf{x}}^{y_l} - \hat{d}_{\mathbf{x}}^{y_l}|.$$

The above equation contradicts. Thereby, we must have  $y_{\mathbf{x}} = \hat{y}_{\mathbf{x}}$ , which completes the proof.  $\square$

### B. Proof of Theorem 2

**Theorem 2.** *For each  $\mathbf{x} \in \mathcal{X}$ , if the predicted label distribution satisfies the following inequality*

$$\sum_{j: y_j \neq y_{\mathbf{x}}} |d_{\mathbf{x}}^{y_j} - \hat{d}_{\mathbf{x}}^{y_j}| \leq \beta_{\mathbf{x}}, \quad (2)$$

*the predicted label satisfies  $\hat{y}_{\mathbf{x}} = y_{\mathbf{x}}$  or  $\hat{y}_{\mathbf{x}} = y'_{\mathbf{x}}$ .*

*Proof.* The theorem holds if  $\hat{y}_{\mathbf{x}} = y_{\mathbf{x}}$ . Next, we will prove that  $\hat{y}_{\mathbf{x}} = y'_{\mathbf{x}}$  if  $\hat{y}_{\mathbf{x}} \neq y_{\mathbf{x}}$ .

We prove by contradiction. Suppose for the sake of contradiction that  $\hat{y}_{\mathbf{x}} \neq y'_{\mathbf{x}}$ . Without loss of generality, let

$\hat{y}_{\mathbf{x}} = y_i \neq y_{\mathbf{x}}$  and  $y'_{\mathbf{x}} = y_j$ . If  $y_i \neq y_j$ . By the definition of  $\hat{y}_{\mathbf{x}}$ , we have  $\hat{d}_{\mathbf{x}}^{y_i} > \hat{d}_{\mathbf{x}}^{y_j}$ . Recall  $y'_{\mathbf{x}} = \arg \max_{\bar{y} \neq y_{\mathbf{x}}} d_{\mathbf{x}}^{\bar{y}}$ . Then, we have  $d_{\mathbf{x}}^{y_j} > d_{\mathbf{x}}^{y_i}$  because  $y_i \neq y_{\mathbf{x}}$ . By Lemma 1,

$$d_{\mathbf{x}}^{y_j} - d_{\mathbf{x}}^{y_i} < |d_{\mathbf{x}}^{y_j} - \hat{d}_{\mathbf{x}}^{y_j}| + |d_{\mathbf{x}}^{y_i} - \hat{d}_{\mathbf{x}}^{y_i}|. \quad (3)$$

If  $y_i = y_j$ , the above inequality still holds. Notice that  $y_j \neq y_{\mathbf{x}}$  and  $y_i \neq y_{\mathbf{x}}$ , which leads to  $\beta_{\mathbf{x}} \leq d_{\mathbf{x}}^{y_j} - d_{\mathbf{x}}^{y_i}$  and  $|d_{\mathbf{x}}^{y_j} - \hat{d}_{\mathbf{x}}^{y_j}| + |d_{\mathbf{x}}^{y_i} - \hat{d}_{\mathbf{x}}^{y_i}| \leq \sum_{l: y_l \neq y_{\mathbf{x}}} |d_{\mathbf{x}}^{y_l} - \hat{d}_{\mathbf{x}}^{y_l}|$ . Thereby,

$$\beta_{\mathbf{x}} < \sum_{l: y_l \neq y_{\mathbf{x}}} |d_{\mathbf{x}}^{y_l} - \hat{d}_{\mathbf{x}}^{y_l}|,$$

which contradicts. Hence, we must  $\hat{y}_{\mathbf{x}} = y'_{\mathbf{x}}$ , which completes the proof.  $\square$

### C. Proof of Theorem 3

**Theorem 3.** *Let  $\mathcal{F} = \{\mathbf{x} \mapsto \mathbf{W}^{\top} \cdot \mathbf{x} : \|\mathbf{w}_j\|_2 \leq \Lambda\}$  be the hypothesis space. Fix  $1 > \rho > 0$ . For any  $\delta > 0$ , with probability at least  $1 - \delta$ , the bounds hold for all  $f \in \mathcal{F}$ ,*

$$R(f) \leq \hat{R}_{\rho}(f) + \frac{2\sqrt{2}r\Lambda m}{(1-\rho)\sqrt{n}} + \sqrt{\frac{\log 1/\delta}{2n}},$$

$$R(f) \leq \min \left\{ \hat{R}_{\rho}(f) + \frac{2\sqrt{2}r\Lambda m}{(1-\rho)\sqrt{n}}, \right. \\ \left. \tilde{R}_{\rho}(f) + \frac{4r\Lambda m}{\rho\sqrt{n}} \right\} + \sqrt{\frac{\log 2/\delta}{2n}}.$$

Before presenting the proof, we introduce the following definition.

**Definition.** *For any  $\rho < 1$ , define the  $\rho$ -margin loss  $\Phi_{\rho}$*

$$\Phi_{\rho}(x) = \begin{cases} 0 & \text{if } x \leq \rho \\ \frac{x-\rho}{1-\rho} & \text{if } \rho < x \leq 1 \\ 1 & \text{otherwise.} \end{cases}$$

Fig. 1 shows the  $\rho$ -insensitive loss and the  $\rho$ -margin loss. It's trivial that  $\Phi_{\rho}$  satisfies  $1/(1-\rho)$ -Lipschitzness.

*Proof.* Recall  $L = \{l_{\mathbf{x}}^{y_1}, \dots, l_{\mathbf{x}}^{y_m}\}$ , where  $l_{\mathbf{x}}^{y_j}$  equals 1 if  $y_j = y_{\mathbf{x}}$  and 0 otherwise. Let  $\mathcal{H} = \{z = (\mathbf{x}, y_{\mathbf{x}}) \mapsto \sum_j |f_j(\mathbf{x}) - l_{\mathbf{x}}^{y_j}| : f \in \mathcal{F}\}$ . Consider the family of functions taking values in  $[0, 1]$

$$\tilde{\mathcal{H}} = \{\Phi_{\rho} \circ h : h \in \mathcal{H}\}.$$

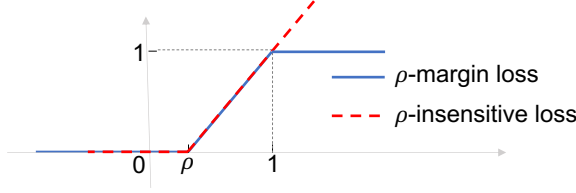

Figure 1. Illustration of the  $\rho$ -insensitive loss and  $\rho$ -margin loss.

Applying a standard Rademacher bound (Mohri et al., 2018) to  $\mathcal{H}$ , for any  $\delta > 0$ , with probability at least  $1 - \delta$ , the following bound holds for all  $g \in \tilde{\mathcal{H}}$ ,

$$\mathbb{E}[g(z)] \leq \frac{1}{n} \sum_{i=1}^n g(z_i) + 2\mathcal{R}_n(\tilde{\mathcal{H}}) + \sqrt{\frac{\log 1/\delta}{2n}},$$

and the following bound holds for all  $f \in \mathcal{F}$

$$\mathbb{E}[\Phi_\rho(\|f(\mathbf{x}) - L\|_1)] \leq \hat{R}_\rho(f) + 2\mathcal{R}_n(\Phi_\rho \circ \mathcal{H}) + \sqrt{\frac{\log 1/\delta}{2n}}.$$

By Corollary 1,  $\mathbb{E}[\Phi_\rho(\|f(\mathbf{x}) - L\|_1)] \geq \mathbb{I}(\hat{y}_{\mathbf{x}} \neq y_{\mathbf{x}}) = 0$  if  $\|f(\mathbf{x}) - L\|_1 \leq 1$ . Moreover,  $\mathbb{E}[\Phi_\rho(\|f(\mathbf{x}) - L\|_1)] = 1$  if  $\|f(\mathbf{x}) - L\|_1 \geq 1$ . Hence,  $R(f) \leq \mathbb{E}[\Phi_\rho(\|f(\mathbf{x}) - L\|_1)]$ , which leads to

$$R(f) \leq \hat{R}_\rho(f) + 2\mathcal{R}_n(\Phi_\rho \circ \mathcal{H}) + \sqrt{\frac{\log 1/\delta}{2n}}.$$

By the  $1/(1-\rho)$ -Lipschitzness of  $\Phi_\rho$ , we have

$$\mathcal{R}_n(\Phi_\rho \circ \mathcal{H}) \leq \frac{1}{1-\rho} \mathcal{R}_n(\mathcal{H}) \leq \frac{\sqrt{2}}{1-\rho} \sum_{j=1}^m \mathcal{R}_n(\mathcal{F}_j),$$

where the second inequality is according to (Maurer, 2016), and  $\mathcal{F}_j = \{\mathbf{x} \mapsto \mathbf{w}_j \cdot \mathbf{x} : \|\mathbf{w}_j\|_2 \leq \Lambda\}$ . According to (Mohri et al., 2018),  $\mathcal{R}_n(\mathcal{F}_j) \leq \Lambda r / \sqrt{n}$ , which yields

$$\mathcal{R}_n(\Phi_\rho \circ \mathcal{H}) \leq \frac{\sqrt{2}m\Lambda r}{(1-\rho)\sqrt{n}}.$$

Thus, we have the following bound

$$R(f) \leq \hat{R}_\rho(f) + \frac{2\sqrt{2}m\Lambda r}{(1-\rho)\sqrt{n}} + \sqrt{\frac{\log 1/\delta}{2n}}, \quad (4)$$

which completes the proof for the first part.

Next, we prove the second part. The first part can be equivalently re-written as, for any  $\delta > 0$ , with probability at least  $1 - \delta/2$ , the following bound holds for all  $f \in \mathcal{F}$ ,

$$R(f) \leq \hat{R}_\rho(f) + \frac{2\sqrt{2}m\Lambda r}{(1-\rho)\sqrt{n}} + \sqrt{\frac{\log 2/\delta}{2n}}. \quad (5)$$

Besides, Mohri et al. (2018) showed that for a multi-class SVM, the generalization bound is as follows: for any  $\delta > 0$ ,

with probability at least  $1 - \delta/2$ , the following bound holds for all  $f \in \mathcal{F}$ ,

$$R(f) < \tilde{R}_\rho(f) + \frac{4m\Lambda r}{\rho\sqrt{n}} + \sqrt{\frac{\log 2/\delta}{2n}}. \quad (6)$$

Combine Eqs. (5) and (6), which completes the proof for the second part.  $\square$

## D. Proof of Theorem 5

**Theorem 5.** Let  $\hat{d}$  be a learned LDL function. Let  $\mathcal{N}$  and  $\mathcal{M}$  be defined above. Then, the following bound holds

$$\mathbb{P}(\hat{y}_{\mathbf{x}} \neq y) - L_1^* \leq \mathbb{E}_{\mathbf{x} \sim \mathcal{D}_{\mathcal{N} \cap \mathcal{M}}} \left[ \sum_{\bar{y}} |\hat{d}_{\mathbf{x}}^{\bar{y}} - d_{\mathbf{x}}^{\bar{y}}| \right].$$

Before proving the theorem, we introduce the following lemma.

**Lemma 2.** Fix an  $\mathbf{x}$ . Then,

$$\mathbb{P}_y[\hat{y}_{\mathbf{x}} \neq y \mid \mathbf{x}] - \mathbb{P}_y[y_{\mathbf{x}} \neq y \mid \mathbf{x}] = d_{\mathbf{x}}^{y_{\mathbf{x}}} - d_{\mathbf{x}}^{\hat{y}_{\mathbf{x}}}.$$

*Proof of Lemma 2.* First, we have

$$\mathbb{P}_y[\hat{y}_{\mathbf{x}} \neq y \mid \mathbf{x}] = 1 - \mathbb{P}_y[y = \hat{y}_{\mathbf{x}} \mid \mathbf{x}] = 1 - d_{\mathbf{x}}^{\hat{y}_{\mathbf{x}}},$$

and

$$\mathbb{P}_y[y_{\mathbf{x}} \neq y \mid \mathbf{x}] = 1 - \mathbb{P}_y[y = y_{\mathbf{x}} \mid \mathbf{x}] = 1 - d_{\mathbf{x}}^{y_{\mathbf{x}}},$$

which yields

$$\mathbb{P}_y[\hat{y}_{\mathbf{x}} \neq y \mid \mathbf{x}] - \mathbb{P}_y[y_{\mathbf{x}} \neq y \mid \mathbf{x}] = d_{\mathbf{x}}^{y_{\mathbf{x}}} - d_{\mathbf{x}}^{\hat{y}_{\mathbf{x}}}.$$

$\square$

*Proof of Theorem 5.* First, notice that

$$\begin{aligned} & \mathbb{P}(\hat{y}_{\mathbf{x}} \neq y) - L_1^* \\ &= \mathbb{E}_{y, \mathbf{x} \sim \mathcal{D}_{\mathcal{N} \cap \mathcal{M}}} [\mathbb{I}(\hat{y}_{\mathbf{x}} \neq y) - \mathbb{I}(y_{\mathbf{x}} \neq y)] \\ &+ \mathbb{E}_{y, \mathbf{x} \sim \mathcal{D}_{\bar{\mathcal{N}} \cup \mathcal{M}}} [\mathbb{I}(\hat{y}_{\mathbf{x}} \neq y) - \mathbb{I}(y_{\mathbf{x}} \neq y)], \end{aligned} \quad (7)$$

where  $\bar{\mathcal{N}} = \mathcal{X} \setminus \mathcal{N}$  is the complementary set of  $\mathcal{N}$ . By the definitions of  $\mathcal{N}$  and  $\mathcal{M}$ , for any  $\mathbf{x} \in \bar{\mathcal{N}} \cup \mathcal{M}$ ,  $\hat{y}_{\mathbf{x}} = y_{\mathbf{x}}$ . According to Lemma 2, the second item on the right-hand side of Eq. (7) reduces to 0. Similarly, according to Lemma 2, the first item on the right-hand side of Eq. (7) equals

$$\mathbb{E}_{\mathbf{x} \sim \mathcal{N} \cap \mathcal{M}} [d_{\mathbf{x}}^{y_{\mathbf{x}}} - d_{\mathbf{x}}^{\hat{y}_{\mathbf{x}}}] .$$

If  $y_{\mathbf{x}} \neq \hat{y}_{\mathbf{x}}$ , according to Eq. (1), it follows that

$$d_{\mathbf{x}}^{y_{\mathbf{x}}} - d_{\mathbf{x}}^{\hat{y}_{\mathbf{x}}} \leq \sum_j |\hat{d}_{\mathbf{x}}^{y_j} - d_{\mathbf{x}}^{y_j}|.$$

If  $y_{\mathbf{x}} = \hat{y}_{\mathbf{x}}$ , the above inequality still holds. Thereby,

$$\begin{aligned} \mathbb{P}(\hat{y}_{\mathbf{x}} \neq y) - L_1^* &\leq \mathbb{E}_{\mathbf{x} \sim \mathcal{N} \cap \mathcal{M}} [d_{\mathbf{x}}^{y_{\mathbf{x}}} - d_{\mathbf{x}}^{\hat{y}_{\mathbf{x}}}] \\ &\leq \mathbb{E}_{\mathbf{x} \sim \mathcal{D}_{\mathcal{N} \cap \mathcal{M}}} \left[ \sum_j |\hat{d}_{\mathbf{x}}^{y_j} - d_{\mathbf{x}}^{y_j}| \right], \end{aligned}$$

which completes the proof.  $\square$

## E. Proof of Theorem 6

**Theorem 6..** Let  $\mathcal{F}$  be the hypothesis space defined in Theorem 3. Fix  $1 > \rho > 0$  and  $\beta \geq 0$  such that  $\beta \leq \beta_{\mathbf{x}}$  for all  $\mathbf{x} \in \mathcal{X}$ . Then, for any  $\delta > 0$ , with probability at least  $1 - \delta$ , the following bound holds for all  $f \in \mathcal{F}$

$$\begin{aligned} \mathbb{P}(\hat{y}_{\mathbf{x}} \neq y) &\leq \min \left\{ L_1^* + \hat{R}_{\rho}(f) + \frac{2\sqrt{2}r\Lambda m}{(1-\rho)\sqrt{n}}, \right. \\ &\quad \left. L_2^* + \hat{R}_{\beta}(f) + \frac{2\sqrt{2}m\Lambda r}{\sqrt{n}} \right\} + \sqrt{\frac{\log 2/\delta}{2n}}. \end{aligned}$$

To prove Theorem 6, we first establish following lemmas.

**Lemma 3.** Let  $\mathcal{F}$  be the hypothesis space defined in Theorem 3. Fix  $1 > \rho > 0$ . Then, for any  $\delta > 0$ , with probability at least  $1 - \delta$ , the following bounds for all  $f \in \mathcal{F}$

$$\mathbb{P}(\hat{y}_{\mathbf{x}} \neq y) - L_1^* \leq \hat{R}_{\rho}(f) + \frac{2\sqrt{2}r\Lambda m}{(1-\rho)\sqrt{n}} + \sqrt{\frac{\log \frac{1}{\delta}}{2n}}.$$

*Proof of Lemma 3.* Fix an  $\mathbf{x}$ . If  $\|f(\mathbf{x}) - L\|_1 \leq 1$ ,  $\hat{y}_{\mathbf{x}} = y_{\mathbf{x}}$ , which implies that  $\mathbb{P}_y[\hat{y}_{\mathbf{x}} \neq y | \mathbf{x}] - \mathbb{P}_y[y_{\mathbf{x}} \neq y | \mathbf{x}] = 0$ . Besides,  $\mathbb{P}_y[\hat{y}_{\mathbf{x}} \neq y | \mathbf{x}] - \mathbb{P}_y[y_{\mathbf{x}} \neq y | \mathbf{x}] \leq 1$ . By the definition of  $\Phi_{\rho}$ ,  $\Phi_{\rho}(\|f(\mathbf{x}) - L\|_1)$  is larger than or equal to 0 if  $\|f(\mathbf{x}) - L\|_1 \leq 1$  and is larger than 1 otherwise. Thereby, we have

$$\mathbb{P}_y[\hat{y}_{\mathbf{x}} \neq y | \mathbf{x}] - \mathbb{P}_y[y_{\mathbf{x}} \neq y | \mathbf{x}] \leq \Phi_{\rho}(\|f(\mathbf{x}) - L\|_1).$$

Take expectation on both sides of the above inequality,

$$\mathbb{P}(\hat{y}_{\mathbf{x}} \neq y) - L_1^* \leq \mathbb{E}[\Phi_{\rho}(\|f(\mathbf{x}) - L\|_1)]. \quad (8)$$

According to proof of Theorem 3, the right-hand side of above inequality is bounded by

$$\mathbb{E}[\Phi_{\rho}(\|f(\mathbf{x}) - L\|_1)] \leq \hat{R}_{\rho}(f) + \frac{2\sqrt{2}m\Lambda r}{(1-\rho)\sqrt{n}} + \sqrt{\frac{\log \frac{1}{\delta}}{2n}}.$$

Combine the above inequality and Eq. (8), which completes the proof.  $\square$

**Lemma 4.** Let  $\beta$  be defined in Theorem 6. Let  $\hat{d}$  be a learned LDL function. Then, the following bound holds

$$\mathbb{E}_{y, \mathbf{x}} [\mathbb{I}(\hat{y}_{\mathbf{x}} \neq y)] - L_2^* \leq \mathbb{E} \left[ \ell_{\beta} \left( \sum_{j: y_j \neq y_{\mathbf{x}}} |\hat{d}_{\mathbf{x}}^{y_j} - d_{\mathbf{x}}^{y_j}| \right) + \beta \right].$$

*Proof of Lemma 4.* Fix an  $\mathbf{x}$ . By Lemma 2, we have

$$\mathbb{P}_y[\hat{y}_{\mathbf{x}} \neq y | \mathbf{x}] - \mathbb{P}_y[y'_{\mathbf{x}} \neq y | \mathbf{x}] = d_{\mathbf{x}}^{y'_{\mathbf{x}}} - d_{\mathbf{x}}^{\hat{y}_{\mathbf{x}}}.$$

If  $\hat{y}_{\mathbf{x}} \neq y_{\mathbf{x}}$ , by Eq. (3), it follows that

$$d_{\mathbf{x}}^{y'_{\mathbf{x}}} - d_{\mathbf{x}}^{\hat{y}_{\mathbf{x}}} \leq \sum_{j: y_j \neq y_{\mathbf{x}}} |\hat{d}_{\mathbf{x}}^{y_j} - d_{\mathbf{x}}^{y_j}|.$$

If  $\hat{y}_{\mathbf{x}} = y_{\mathbf{x}}$ , the above inequality still holds. Thereby,

$$\mathbb{P}_y[\hat{y}_{\mathbf{x}} \neq y_{\mathbf{x}}] - \mathbb{P}_y[y'_{\mathbf{x}} \neq y | \mathbf{x}] \leq \sum_{j: y_j \neq y_{\mathbf{x}}} |\hat{d}_{\mathbf{x}}^{y_j} - d_{\mathbf{x}}^{y_j}|.$$

Recall the definition of  $\ell_{\beta}$ , we have

$$\mathbb{P}_y[\hat{y}_{\mathbf{x}} \neq y_{\mathbf{x}}] - \mathbb{P}_y[y'_{\mathbf{x}} \neq y | \mathbf{x}] \leq \ell_{\beta} \left( \sum_{j: y_j \neq y_{\mathbf{x}}} |\hat{d}_{\mathbf{x}}^{y_j} - d_{\mathbf{x}}^{y_j}| \right) + \beta.$$

Taking expectation on both sides of the above equation, we completes the proof.  $\square$

**Lemma 5.** Let  $\mathcal{F}$  be the hypothesis space defined in Theorem 3. Fix  $\beta > 0$  as Theorem 6 does. Then, for any  $\delta > 0$ , with probability at least  $1 - \delta$ , the bounds for all  $f \in \mathcal{F}$

$$\mathbb{E}[\mathbb{I}(\hat{y}_{\mathbf{x}} \neq y)] - L_2^* \leq (\hat{R}_{\beta}(f) + \beta) + \frac{2\sqrt{2}m\Lambda r}{\sqrt{n}} + \sqrt{\frac{\log \frac{1}{\delta}}{2n}}.$$

*Proof of Lemma 5.* To start, define

$$\ell'_{\beta}(x) = \min\{1, \ell_{\beta}(x) + \beta\}$$

According to Lemma 4, it's trivial to see that

$$\mathbb{E}_{y, \mathbf{x}} [\mathbb{I}(\hat{y}_{\mathbf{x}} \neq y)] - L_2^* \leq \mathbb{E} \left[ \ell'_{\beta} \left( \sum_{j: y_j \neq y_{\mathbf{x}}} |\hat{d}_{\mathbf{x}}^{y_j} - d_{\mathbf{x}}^{y_j}| \right) \right],$$

because  $\mathbb{E}_{y, \mathbf{x}} [\mathbb{I}(\hat{y}_{\mathbf{x}} \neq y)] - L_2^* \leq 1$ . It suffices to bound the right-hand side of the above equation.

Define  $\mathcal{H} = \{z = (\mathbf{x}, D) \mapsto \sum_{j: y_j \neq y_{\mathbf{x}}} |f_j(\mathbf{x}) - d_{\mathbf{x}}^{y_j}| : f \in \mathcal{F}\}$ . Applying a standard Rademacher bound (Mohri et al., 2018) to  $\ell'_{\beta} \circ \mathcal{H}$ , for any  $\delta > 0$ , with probability at  $1 - \delta$ , the following bound holds for all  $f \in \mathcal{F}$

$$\begin{aligned} \mathbb{E} \left[ \ell'_{\beta} \left( \sum_{j: y_j \neq y_{\mathbf{x}}} |\hat{d}_{\mathbf{x}}^{y_j} - d_{\mathbf{x}}^{y_j}| \right) \right] &\leq \hat{R}_{\beta}(f) \\ &\quad + 2\mathcal{R}_n(\ell'_{\beta} \circ \mathcal{H}) + \sqrt{\frac{\log \frac{1}{\delta}}{2n}}. \end{aligned}$$

By the 1-Lipschitzness of  $\ell'_{\beta}$ , it follows that

$$\mathcal{R}_n(\ell'_{\beta} \circ \mathcal{H}) \leq \mathcal{R}_n(\mathcal{H}).$$

Define  $\ell(D, \hat{D}) = \sum_{j: y_j \neq y_x} |\hat{d}_x^{y_j} - d_x^{y_j}|$ . Then,  $\mathcal{H}$  can be equivalently re-written as  $\ell \circ \mathcal{F}$ . Notice that  $\ell$  satisfies 1-Lipschitzness since

$$\ell(D, \hat{D}) - \ell(D, \bar{D}) \leq \|\hat{D} - \bar{D}\|_1.$$

Similar to the proof of Theorem 3, we have

$$\mathcal{R}_n(\mathcal{H}) \leq \frac{\sqrt{2m\Lambda r}}{\sqrt{n}},$$

which leads to

$$\mathbb{E}_{y, \mathbf{x}} [\mathbb{I}(\hat{y}_x \neq y)] - L_2^* \leq \hat{R}_\beta(f) + \frac{2\sqrt{2m\Lambda r}}{\sqrt{n}} + \sqrt{\frac{\log \frac{1}{\delta}}{2n}}.$$

□

*Proof of Theorem 6.* The proof of Theorem 6 comes naturally by combining Lemmas 3 and 5. □

## References

- Maurer, A. A vector-contraction inequality for rademacher complexities. In *Proceedings of International Conference on Algorithmic Learning Theory*, pp. 3–17, 2016.
- Mohri, M., Rostamizadeh, A., and Talwalkar, A. *Foundations of Machine Learning*. Adaptive Computation and Machine Learning. MIT Press, Cambridge, MA, 2 edition, 2018. ISBN 978-0-262-03940-6.
- Wang, J. and Geng, X. Theoretical analysis of label distribution learning. In *Proceedings of the AAAI Conference on Artificial Intelligence*, pp. 5256–5263, 2019.
